# Supplementary material for: Lactobacilli Profile in Faecal Samples of Tunisian Children Diagnosed with Autism Spectrum Disorder
Source: MDPI journal article supplement (doi:10.3390/microbiolres14030082), 2023-08-24
Supplement: s1 [file s1]

**Supporting information for:**

**Lactobacilli profile in faecal samples of Tunisian children diagnosed with Autism Spectrum Disorder**

Mariam Chamtouri <sup>1,2</sup>, Abderrahmen Merghni <sup>3</sup>, Naoufel Gaddour <sup>4</sup>, Maha Mastouri <sup>2</sup>, Silvia Arboleya <sup>1,5\*</sup>, and Clara G. de los Reyes-Gavilán <sup>1,5\*</sup>

<sup>1</sup> Department of Microbiology and Biochemistry of Dairy Products, Instituto de Productos Lácteos de Asturias (IPLA-CSIC), 33300, Villaviciosa, Asturias, Spain; myriam.chantouri88@gmail.com (M.C.)

<sup>2</sup> Laboratory of Transmissible Diseases and Biologically Active Substances LR99ES27, Faculty of Pharmacy, University of Monastir, Monastir. Tunisia; mastourimaha@yahoo.fr (M.M.)

<sup>3</sup> Laboratory of Antimicrobial Resistance LR99ES09, Faculty of Medicine of Tunis, University of Tunis El Man-ar. Tunis, Tunisia; abderrahmen\_merghni@yahoo.fr (A.M.)

<sup>4</sup> Unit of Child Psychiatry. Monastir University Hospital. Monastir, Tunisia; naoufel.gaddour@gmail.com (N.G.)

<sup>5</sup> Diet, Microbiota, and Health Group, Instituto de Investigación Sanitaria del Principado de Asturias (ISPA), 33011, Oviedo, Spain; silvia.arboleya@ipla.csic.es (S.A.)

\* **Correspondence:** greyes\_gavilan@ipla.csic.es (C.G.R.G.)

**Table S1** Molecular identification of lactobacilli strains isolated from stools of autistic children (ASD), their siblings (SIB) and children from the general population (GP)

| Isolates code | Child code | Origin | Species identification by partial 16S rRNA gene sequencing | Accession number to an identical sequence in GenBank                 | Percent identity (%)                                         |
|---------------|------------|--------|------------------------------------------------------------|----------------------------------------------------------------------|--------------------------------------------------------------|
| Lacto A1      | A1         | ASD    | <i>L. salivarius</i>                                       | KP090131.1                                                           | 99.40%                                                       |
| Lacto A2I1    | A2         | ASD    | <i>L. salivarius</i>                                       | MT611610.1                                                           | 99.60%                                                       |
| Lacto A2I2    | A2         | ASD    | <i>L. mucosae</i>                                          | MT463485.1                                                           | 99.80%                                                       |
| Lacto A3      | A3         | ASD    | <i>L. salivarius</i>                                       | KP090131.1                                                           | 99.39%                                                       |
| Lacto A5      | A5         | ASD    | <i>L. paracasei</i>                                        | MK652788.1                                                           | 99.59%                                                       |
| Lacto A6I1    | A6         | ASD    | <i>L. rhamnosus</i>                                        | MN966850.1                                                           | 99.80%                                                       |
| Lacto A6I2    | A6         | ASD    | <i>L. gasseri</i>                                          | MT597618.1                                                           | 100%                                                         |
| Lacto A10     | A10        | ASD    | <i>L. rhamnosus</i>                                        | OQ117234.1                                                           | 99.80%                                                       |
| Lacto A11I1   | A11        | ASD    | <i>L. rhamnosus</i>                                        | AY773957.1                                                           | 99.38%                                                       |
| Lacto A11I2   | A11        | ASD    | <i>L. gasseri</i>                                          | MT597618.1                                                           | 100%                                                         |
| Lacto A12     | A12        | ASD    | <i>L. salivarius</i>                                       | MT611849.1                                                           | 100%                                                         |
| Lacto A14I1   | A14        | ASD    | <i>L. rhamnosus</i>                                        | MG515300.1                                                           | 99.18%                                                       |
| Lacto A14I2   | A14        | ASD    | <i>L. gasseri</i>                                          | ON377140.1                                                           | 99.39%                                                       |
| Lacto A15     | A15        | ASD    | <i>L. plantarum</i>                                        | MT538537.1                                                           | 98.55%                                                       |
| Lacto A17     | A17        | ASD    | <i>L. plantarum</i>                                        | MT473388.1                                                           | 99.80%                                                       |
| Lacto A18     | A18        | ASD    | <i>L. paracasei</i> / <i>L. casei</i>                      | MH891695.1 ( <i>L. paracasei</i> )<br>MN809276.1 ( <i>L. casei</i> ) | 99.59% ( <i>L. paracasei</i> )<br>99.59% ( <i>L. casei</i> ) |
| Lacto A20     | A20        | ASD    | <i>L. salivarius</i>                                       | MT613472.1                                                           | 98.75%                                                       |
| Lacto A21     | A21        | ASD    | <i>L. salivarius</i>                                       | MT611610.1                                                           | 99.17%                                                       |
| Lacto A23     | A23        | ASD    | <i>L. fermentum</i>                                        | OL455693.1                                                           | 98.98%                                                       |
| Lacto A25     | A25        | ASD    | <i>L. salivarius</i>                                       | MT611610.1                                                           | 98.12%                                                       |

|            |     |     |                                           |                                                                         |                                                                 |
|------------|-----|-----|-------------------------------------------|-------------------------------------------------------------------------|-----------------------------------------------------------------|
| Lacto A27  | A27 | ASD | <i>L. salivarius</i>                      | MT613472.1                                                              | 98.97%                                                          |
| Lacto S1   | S1  | SIB | <i>L. paracasei</i> / <i>L. casei</i>     | MT538897.1 ( <i>L. paracasei</i> )<br>MN650243 ( <i>L. casei</i> )      | 98.18% ( <i>L. paracasei</i> )<br>98.18% ( <i>L. casei</i> )    |
| Lacto S2   | S2  | SIB | <i>L. rhamnosus</i>                       | MT611887.1                                                              | 99.02%                                                          |
| Lacto S4   | S4  | SIB | <i>L. rhamnosus</i>                       | MG461545.1                                                              | 99.80%                                                          |
| Lacto S6I1 | S6  | SIB | <i>L. plantarum</i>                       | MF972523.1                                                              | 98.57%                                                          |
| Lacto S6I2 | S6  | SIB | <i>L. gasseri</i>                         | MT464216.1                                                              | 99.40%                                                          |
| Lacto S7   | S7  | SIB | <i>L. plantarum</i>                       | MT613640.1                                                              | 98.99%                                                          |
| Lacto S8   | S8  | SIB | <i>L. plantarum</i> / <i>L. pentosus</i>  | MW447608.1 ( <i>L. plantarum</i> )<br>MH342629.1 ( <i>L. pentosus</i> ) | 99.59% ( <i>L. plantarum</i> )<br>99.59% ( <i>L. pentosus</i> ) |
| Lacto S9   | S9  | SIB | <i>L. plantarum</i>                       | MZ208271.1                                                              | 99.59%                                                          |
| Lacto S13  | S13 | SIB | <i>L. penstosus</i> / <i>L. plantarum</i> | MT611839.1 ( <i>L. plantarum</i> )<br>OM758292.1 ( <i>L. pentosus</i> ) | 99.60% ( <i>L. plantarum</i> )<br>99.60% ( <i>L. pentosus</i> ) |
| Lacto S15  | S15 | SIB | <i>L. rhamnosus</i>                       | MT611775.1                                                              | 99.21%                                                          |
| Lacto S17  | S17 | SIB | <i>L. salivarius</i>                      | MT611610.1                                                              | 98.57%                                                          |
| Lacto S18  | S18 | SIB | <i>L. rhamnosus</i>                       | MT197200.1                                                              | 99.79%                                                          |
| Lacto G1I1 | G1  | GP  | <i>L. rhamnosus</i>                       | MT613449.1                                                              | 99.20%                                                          |
| Lacto G1I2 | G1  | GP  | <i>L. fermentum</i>                       | KY435721.1                                                              | 100%                                                            |
| Lacto G3   | G3  | GP  | <i>L. salivarius</i>                      | MT613535.1                                                              | 99.59%                                                          |
| Lacto G7   | G7  | GP  | <i>L. plantarum</i>                       | MT473388.1                                                              | 98.82%                                                          |
| Lacto G9   | G9  | GP  | <i>L. salivarius</i>                      | MT613535.1                                                              | 99.59%                                                          |
| Lacto G10  | G10 | GP  | <i>L. plantarum</i>                       | MN746321.1                                                              | 98.97%                                                          |
| Lacto G12  | G12 | GP  | <i>L. plantarum</i>                       | MT613640.1                                                              | 97.01%                                                          |
| Lacto G14  | G14 | GP  | <i>L. paracasei</i>                       | MT545026.1                                                              | 99.59%                                                          |

|           |     |    |                      |            |        |
|-----------|-----|----|----------------------|------------|--------|
| Lacto G18 | G18 | GP | <i>L. plantarum</i>  | MH249090.1 | 98.97% |
| Lacto G20 | G20 | GP | <i>L. rhamnossus</i> | KY197717.1 | 99.39% |
| Lacto G21 | G21 | GP | <i>L. salivarius</i> | CP029616.1 | 99.59% |
| Lacto G22 | G22 | GP | <i>L. salivarius</i> | EU559602.1 | 99.19% |
| Lacto G24 | G24 | GP | <i>L. fermentum</i>  | MT463584.1 | 98.58% |
| Lacto G25 | G25 | GP | <i>L. plantarum</i>  | MT611912.1 | 96.99% |
| Lacto G26 | G26 | GP | <i>L. rhamnossus</i> | MT611888.1 | 99.80% |
| Lacto G27 | G27 | GP | <i>L. salivarius</i> | ON000537.1 | 99.58% |
| Lacto G28 | G28 | GP | <i>L. salivarius</i> | EU559602.1 | 99.39% |

A: Children from the ASD group; S: children from the SIB group; G: children from the GP group; I1 and I2 refer to 2 different isolates from the faecal sample of the same child.

**Table S2** Number and prevalence of lactobacilli isolates in stools from autistic children (ASD), siblings (SIB) and children from the general population (GP) stratified by age (4-7 years, and 8-10 years) and according to the severity of disease (mild to moderate, and severe). P-values are indicated for statistical comparisons among the three groups of children and between the two ranges of severity of disease for the presence or absence of lactobacilli isolates in stool samples.

|                                   |                        | Age                                            |              |             |                                                   |             |              | Severity                                        |                                    |
|-----------------------------------|------------------------|------------------------------------------------|--------------|-------------|---------------------------------------------------|-------------|--------------|-------------------------------------------------|------------------------------------|
|                                   |                        | Children aged between 4 and 7 years<br>(N= 35) |              |             | Children aged between 8 and 10 years<br>(N = 39 ) |             |              |                                                 |                                    |
|                                   |                        | ASD (n = 10)                                   | SIB (n = 11) | GP (n = 14) | ASD (n = 18 )                                     | SIB (n = 7) | GP (n = 14 ) | Children with mild to moderate ASD<br>(n = 11 ) | Children with severe ASD (n = 17 ) |
| Lactobacilli isolation by culture | Positive culture n (%) | 5 (50)                                         | 6 (54.5)     | 10 (71.4)   | 12 (66.7)                                         | 5 (71.4)    | 6 (42.9)     | 6 (54.5)                                        | 11 (64.7)                          |
|                                   | Negative culture n (%) | 5 (50)                                         | 5 (45.5)     | 4 (28.6)    | 6 (33.3)                                          | 2 (28.6)    | 8 (57.1)     | 5 (45.5)                                        | 6 (35.3)                           |
|                                   | p-value                | 0.52                                           |              |             | 0.30                                              |             |              | 0.70                                            |                                    |
